# Supplementary material for: Unprecedented scissor effect of macromolecular cross-linkers on the glass transition temperature of poly(N-vinylimidazole), crystallinity suppression of poly(tetrahydrofuran) and molecular mobility by solid state NMR in poly(N-vinylimidazole)-l-poly(tetrahydrofuran) conetworks
Source: Royal Society of Chemistry journal article supplement (doi:10.1039/c3py00299c), 2013-01-01
Supplement: c3py00299c.pdf [file c3py00299c.pdf]

## ELECTRONIC SUPPLEMENTARY INFORMATION

### Unprecedented Scissor Effect of Macromolecular Cross-linkers on the Glass Transition Temperature of Poly(*N*-vinylimidazole), Crystallinity Suppression of Poly(tetrahydrofuran) and Molecular Mobility by Solid State NMR in Poly(*N*-vinylimidazole)-*l*-poly(tetrahydrofuran) Conetworks

Csaba Fodor<sup>a</sup>, Attila Domján<sup>b</sup> and Béla Iván<sup>a\*</sup>

<sup>a</sup>Department of Polymer Chemistry, Institute of Materials and Environmental Chemistry and <sup>b</sup>NMR Spectroscopy Laboratory, Institute of Organic Chemistry, Research Centre for Natural Sciences, Hungarian Academy of Sciences, Hungarian Academy of Sciences, Püsztaszeri út 59-67, P.O. Box 17, H-1525 Budapest, Hungary.  
E-mail: [ivan.bela@ttk.mta.hu](mailto:ivan.bela@ttk.mta.hu)

**Synthesis of methacrylate-telechelic poly(tetrahydrofuran) (PTHFDMA) macromonomers:** for the lower molecular weight cross-linker the macromolecular methacrylate-telechelic PTHF (PTHFDMA) were prepared by reacting hydroxyl-ended poly(tetrahydrofuran) (PTHFDOH) with methacryloyl chloride. The synthesis of the higher molecular weight dimethacrylate terminated poly(tetrahydrofuran)s (PTHFDMA) macromonomers have been obtained by cationic ring opening polymerization of tetrahydrofuran (THF) by initiation with trifluoromethanesulfonic anhydride (Tf<sub>2</sub>O) and end-capping of the living chains with sodium methacrylate (MANa). Freshly distilled THF (200 mL, 2.48 mol) was added in a 500 mL two-necked flask with a magnetic stirring rod, and it was evacuated and purged with dry nitrogen. Freshly distilled Tf<sub>2</sub>O (0.42 mL, 2.48 mmol) was added to dry THF under permanent stirring. A chloroform suspension of MANa (2.6801 g, 24.8 mmol) was added to the reaction mixture after predetermined time (35 min for PTHFDMA macro-cross-linker of M<sub>n</sub> 10000 g/mol). After 48 hour reaction time the solvent was evaporated and the polymer was precipitated

## ELECTRONIC SUPPLEMENTARY INFORMATION

into water/methanol (1/1) solvent under permanent stirring. The product was dissolved in THF and filtration of polymer solutions through columns of aluminum oxide and silica gel have been developed for the removal of contaminations. The solvent was evaporated and the yield of 25.32 g (14.24%) PTHFDMA was obtained. The efficiency of the end-group modification was confirmed by  $^1\text{H}$ -NMR (functionality = 2.0).

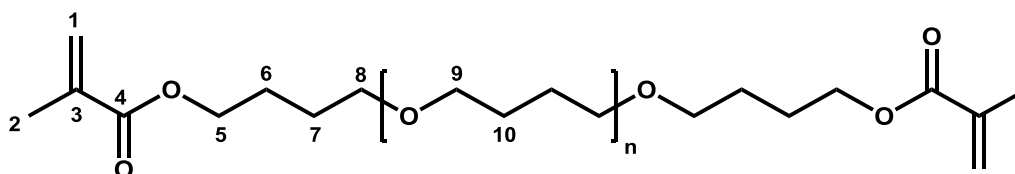

$^1\text{H}$  NMR ( $\text{CDCl}_3$ ):  $\delta$  [ppm] = 1.62 (4H;  $\text{H}_{7,10}$ ; m), 1.76 (4H;  $\text{H}_6$ ; m), 1.94 (2H;  $\text{H}_2$ ; s), 3.41 (4H  $\text{H}_{8,9}$ ; m), 4.17 (4H;  $\text{H}_5$ ; t), 5.54 (1H;  $\text{H}_{1\text{trans}}$ ;m), 6.09 (1H;  $\text{H}_{1\text{cis}}$ ;m)

**Table S1** Characterization of the PTHF dimethacrylate macromonomers (PTHFDMA) obtained by cationic ring opening polymerization.

| Sample     | $M_n^a$<br>(g/mol) | $M_n^b$<br>(g/mol) | $M_w/M_n^b$ | Yield<br>(%) |
|------------|--------------------|--------------------|-------------|--------------|
| PTHFDMA7k  | 6850               | 8650               | 1.19        | 11.6         |
| PTHFDMA10k | 10000              | 11550              | 1.21        | 14.2         |

(a)  $^1\text{H}$  NMR  
(b) GPC

**Differential scanning calorimetry (DSC) analyses** were carried out in order to reveal the phase behavior of the components and crystallinity of PTHF in the poly(*N*-vinylimidazole)-*l*-poly(tetrahydrofuran) (PVIm-*l*-PTHF, “*l*” stands for “*linked by*”) conetworks. Original DSC thermograms and enlarged insets of annealed pure PVIm homopolymer, PTHF macromolecular cross-linkers and PVIm-*l*-PTHF conetwork samples are shown in Fig. S1, Fig. S2-S4 and Fig. S5-S22, respectively. The glass transition temperature ( $T_g$ ) values of the PVIm and PTHF components of the poly(*N*-vinylimidazole)-*l*-poly(tetrahydrofuran) (PVIm-*l*-PTHF) conetworks as a function of composition, enlarged in both temperature ranges, are shown in Fig. S23 and Fig. S24, respectively. Parameters (Compositions, melting points, crystalline fractions ( $X_c$ ) and glass transition temperatures ( $T_g$ ) )of the blends consist of poly(*N*-vinylimidazole)

## ELECTRONIC SUPPLEMENTARY INFORMATION

(PVIIm) and poly(tetrahydrofuran) with varying molecular weights are shown in Table S2. Original DSC thermograms and enlarged insets of annealed blends of PTHF and PVIIm homopolymers consist PVIIm and PTHF with varying composition and molecular weights of poly(tetrahydrofuran), enlarged in both temperature ranges, are shown in Fig. S25- S29, respectively.

**Cross polarization magic angle spinning NMR spectra** of V7k-52 poly(*N*-vinylimidazole)-*l*-poly(tetrahydrofuran) (PVIIm-*l*-PTHF) sample at 45 °C with contact time of 2ms. The spinning speed was 8 kHz, shown in Fig. S30. Time coefficient of the cross polarization ( $T_{CH}$ ) of the aromatic and aliphatic carbons of the poly(*N*-vinylimidazole) phase above the melting temperature of poly(tetrahydrofuran) (at 45 °C) as a function of the average molecular weights of the hydrophilic PVIIm segments between two cross-linking points ( $M_c$ ) in the poly(*N*-vinylimidazole)-*l*-poly(tetrahydrofuran) (PVIIm-*l*-PTHF) conetworks, are shown in Fig. S31 and Fig. S32, respectively.

## ELECTRONIC SUPPLEMENTARY INFORMATION

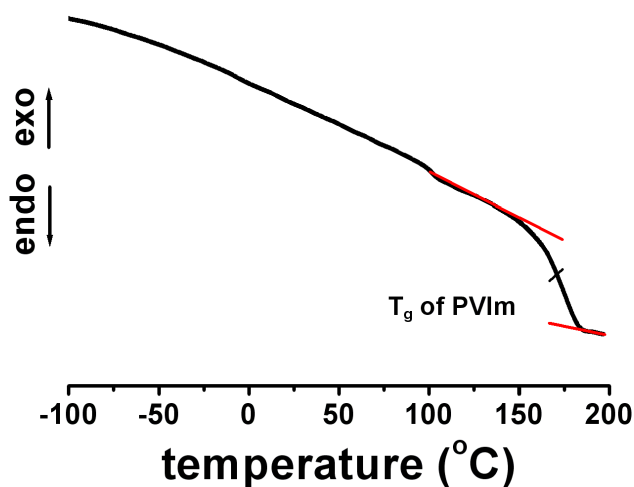

**Fig. S1** Differential scanning calorimetry (DSC) thermogram (second heating scan) of PVIm pure homopolymer (heating rate = 10 °C/min).

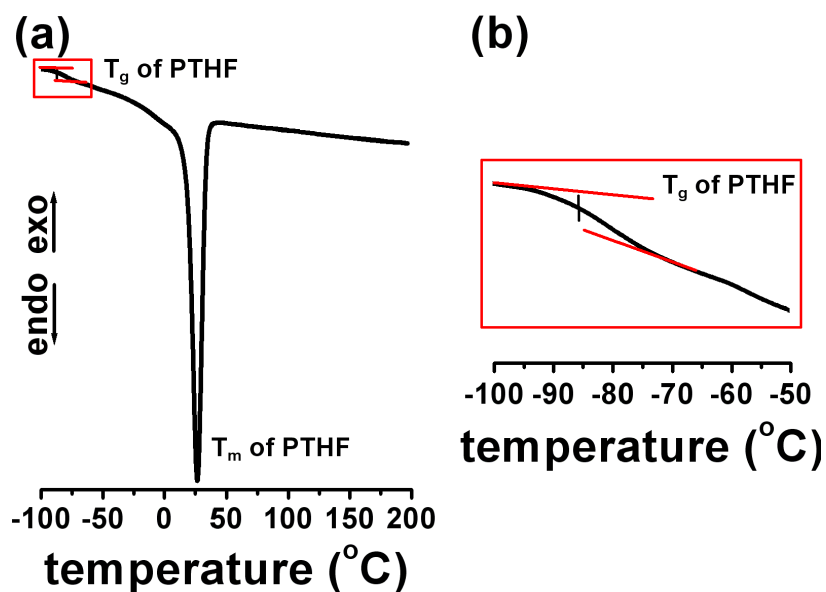

**Fig. S2** Differential scanning calorimetry (DSC) thermogram (second heating scan) of PTHFDMA2k ( $M_n$  of 2170 g/mol) pure macromolecular cross-linker (a) and enlargement of the thermogram in the -100 to -50 °C temperature range (b) (heating rate = 10 °C/min).

## ELECTRONIC SUPPLEMENTARY INFORMATION

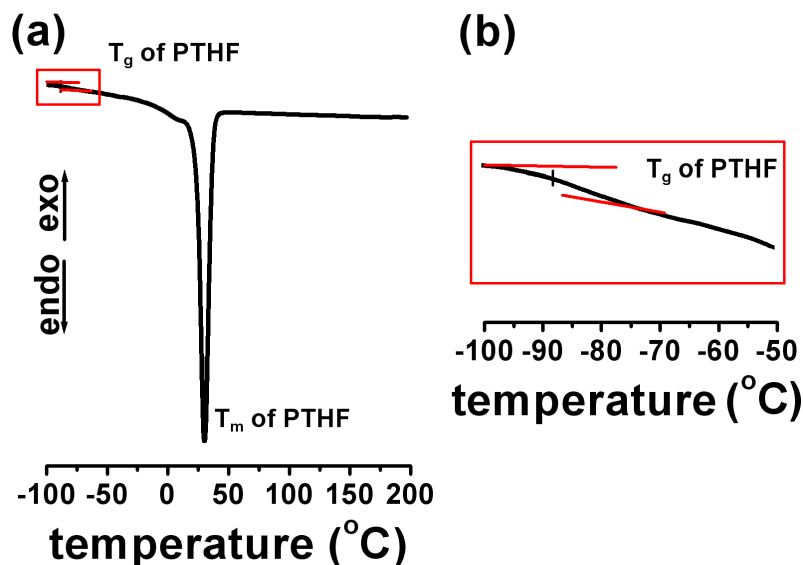

**Fig. S3** Differential scanning calorimetry (DSC) thermogram (second heating scan) of PTHFDMA7k ( $M_n$  of 6850 g/mol) pure macromolecular cross-linker (a) and enlargement of the thermogram in the -100 to -50 °C temperature range (b) (heating rate = 10 °C/min).

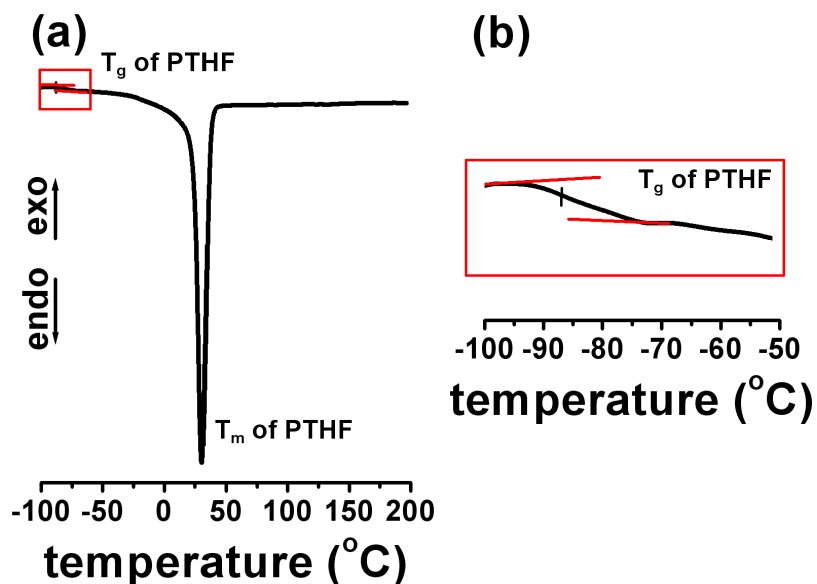

**Fig. S4** Differential scanning calorimetry (DSC) thermogram (second heating scan) of PTHFDMA10k ( $M_n$  of 10000 g/mol) pure macromolecular cross-linker (a) and enlargement of the thermogram in the -100 to -50 °C temperature range (b) (heating rate = 10 °C/min).

## ELECTRONIC SUPPLEMENTARY INFORMATION

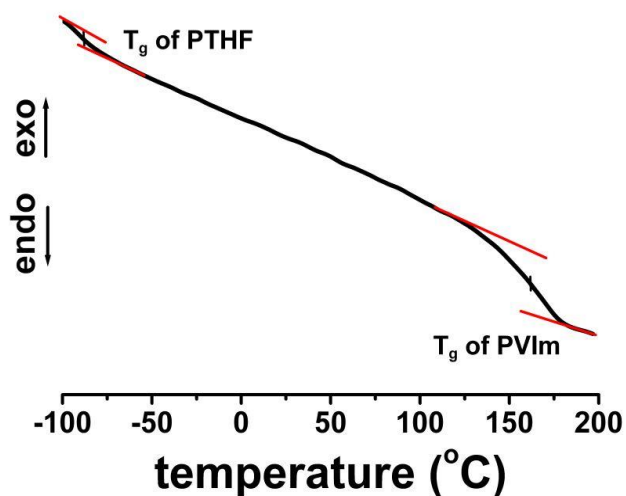

**Fig. S5** Differential scanning calorimetry (DSC) thermogram (second heating scan) of V2k-25 (25 wt% PTHF) PVIm-*l*-PTHF conetwork, containing PTHFDMA with  $M_n$  of 2170 g/mol (heating rate = 10 °C/min).

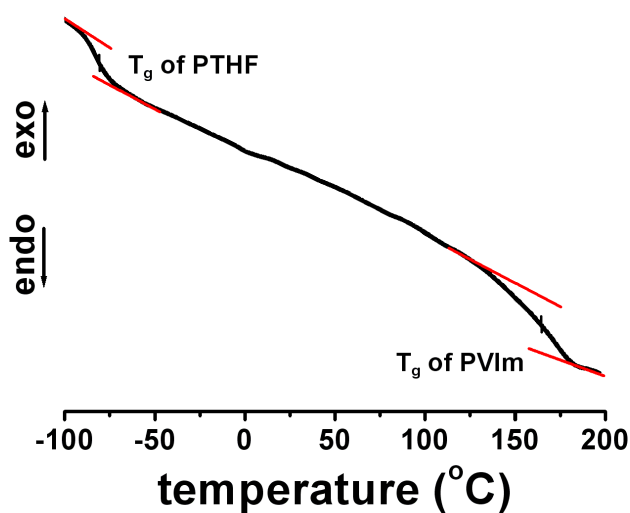

**Fig. S6** Differential scanning calorimetry (DSC) thermogram (second heating scan) of V2k-38 (38 wt% PTHF) PVIm-*l*-PTHF conetwork, containing PTHFDMA with  $M_n$  of 2170 g/mol (heating rate = 10 °C/min).

## ELECTRONIC SUPPLEMENTARY INFORMATION

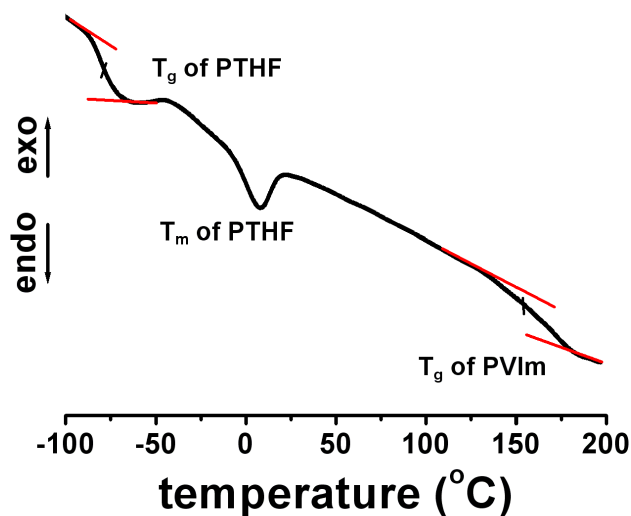

**Fig. S7** Differential scanning calorimetry (DSC) thermogram (second heating scan) of V2k-47 (47 wt% PTHF) PVIIm-*l*-PTHF conetwork, containing PTHFDMA with  $M_n$  of 2170 g/mol (heating rate = 10 °C/min).

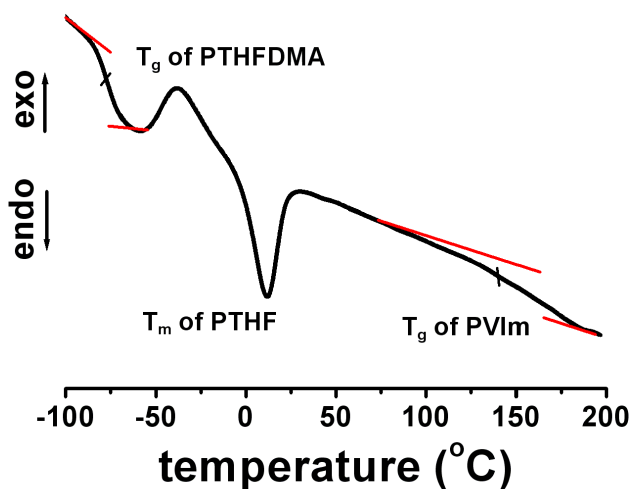

**Fig. S8** Differential scanning calorimetry (DSC) thermogram (second heating scan) of V2k-59 (59 wt% PTHF) PVIIm-*l*-PTHF conetwork, containing PTHFDMA with  $M_n$  of 2170 g/mol (heating rate = 10 °C/min).

## ELECTRONIC SUPPLEMENTARY INFORMATION

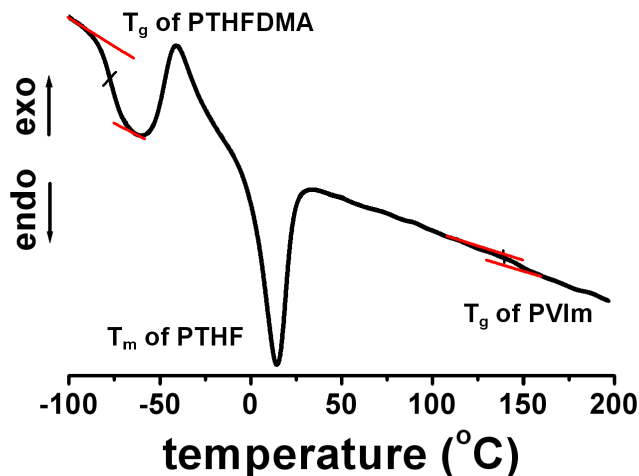

**Fig. S9** Differential scanning calorimetry (DSC) thermogram (second heating scan) of V2k-74 (74 wt% PTHF) PVIm-*l*-PTHF conetwork, containing PTHFDMA with  $M_n$  of 2170 g/mol (heating rate = 10 °C/min).

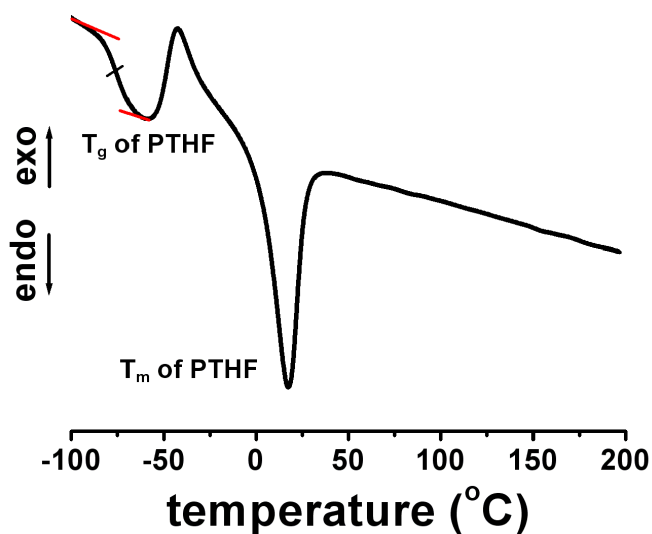

**Fig. S10** Differential scanning calorimetry (DSC) thermogram (second heating scan) of V2k-89 (89 wt% PTHF) PVIm-*l*-PTHF conetwork, containing PTHFDMA with  $M_n$  of 2170 g/mol (heating rate = 10 °C/min).

## ELECTRONIC SUPPLEMENTARY INFORMATION

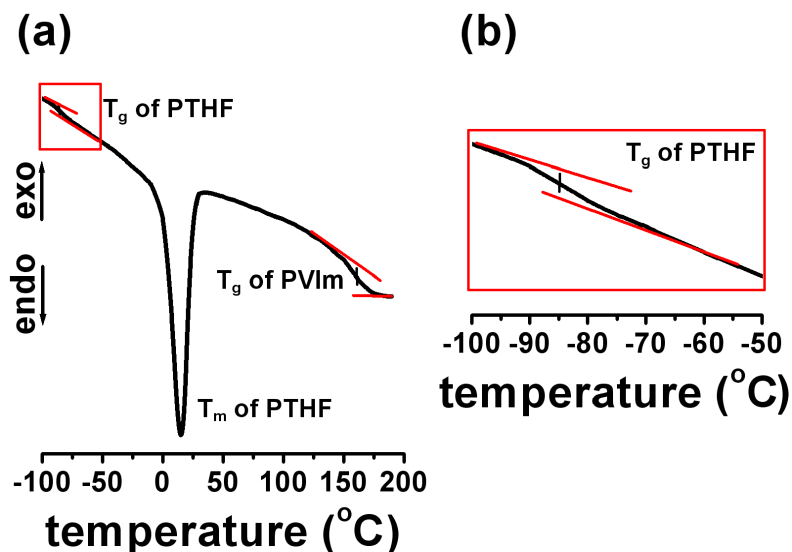

**Fig. S11** Differential scanning calorimetry (DSC) thermogram (second heating scan) of V7k-52 (52 wt% PTHF) PVIm-*l*-PTHF conetwork, containing PTHFDMA with  $M_n$  of 6850 g/mol (a) and enlargement of the thermogram in the -100 to -50 °C temperature range (b) (heating rate = 10 °C/min).

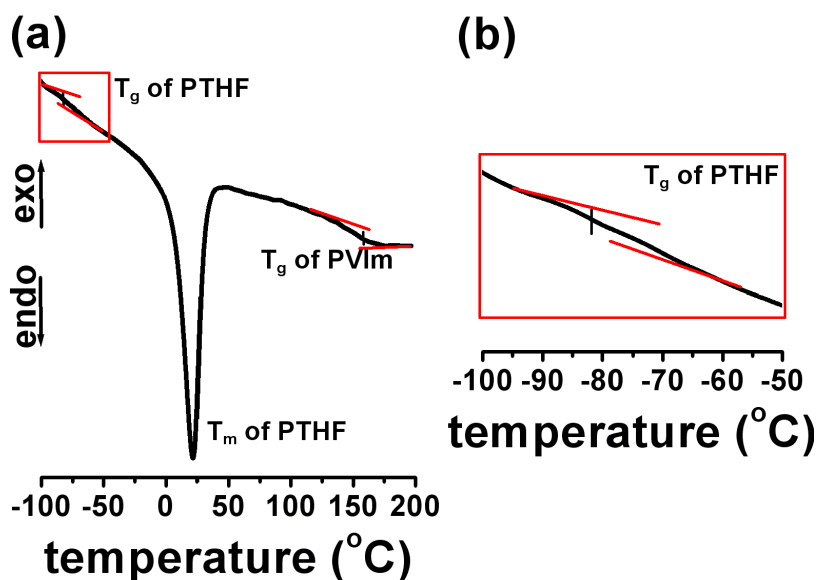

**Fig. S12** Differential scanning calorimetry (DSC) thermogram (second heating scan) of V7k-61 (61 wt% PTHF) PVIm-*l*-PTHF conetwork, containing PTHFDMA with  $M_n$  of 6850 g/mol (a) and enlargement of the thermogram in the -100 to -50 °C temperature range (b) (heating rate = 10 °C/min).

## ELECTRONIC SUPPLEMENTARY INFORMATION

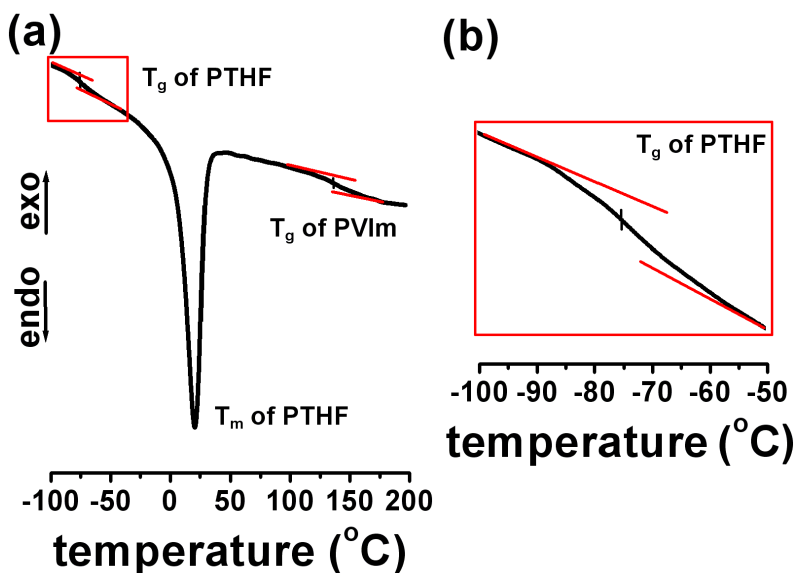

**Fig. S13** Differential scanning calorimetry (DSC) thermogram (second heating scan) of V7k-69 (69 wt% PTHF) PVIIm-*l*-PTHF conetwork, containing PTHFDMA with  $M_n$  of 6850 g/mol (a) and enlargement of the thermogram in the -100 to -50 °C temperature range (b) (heating rate = 10 °C/min).

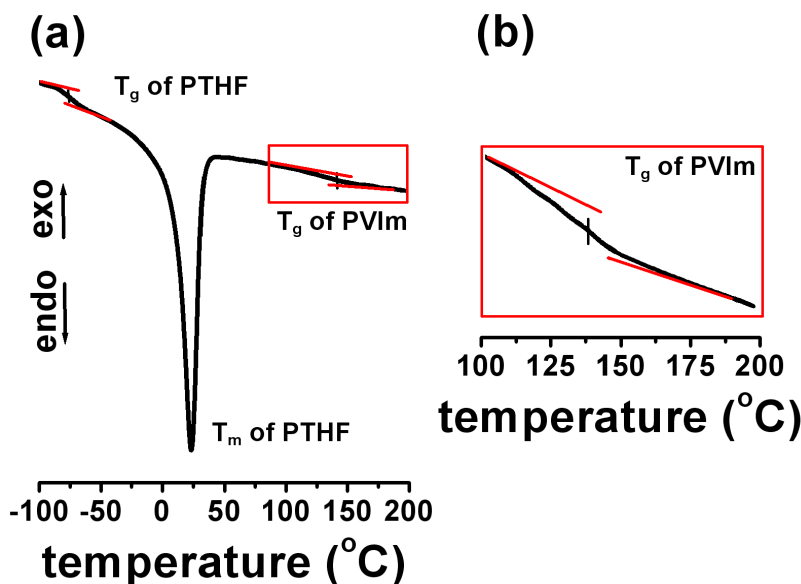

**Fig. S14** Differential scanning calorimetry (DSC) thermogram (second heating scan) of V7k-80 (80 wt% PTHF) PVIIm-*l*-PTHF conetwork, containing PTHFDMA with  $M_n$  of 6850 g/mol (a) enlargement of the thermogram in the 100 to 200 °C temperature range (b) (heating rate = 10 °C/min).

## ELECTRONIC SUPPLEMENTARY INFORMATION

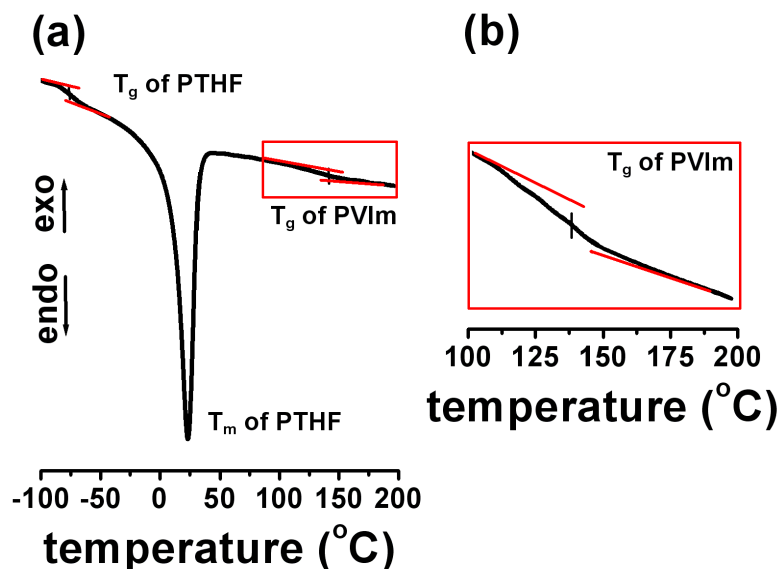

**Fig. S15** Differential scanning calorimetry (DSC) thermogram (second heating scan) of V7k-81 (81 wt% PTHF) PVIm-*l*-PTHF conetwork, containing PTHFDMA with  $M_n$  of 6850 g/mol (a) enlargement of the thermogram in the 100 to 200 °C temperature range (b) (heating rate = 10 °C/min).

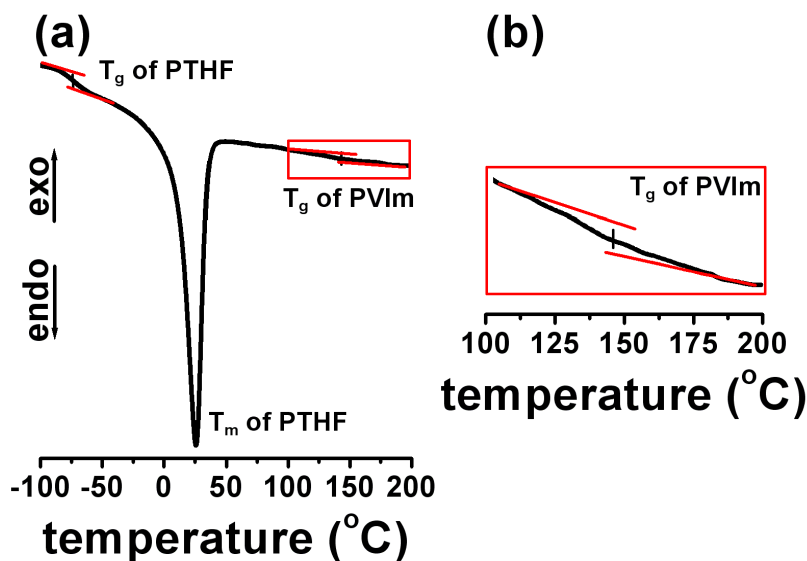

**Fig. S16** Differential scanning calorimetry (DSC) thermogram (second heating scan) of V7k-84 (84 wt% PTHF) PVIm-*l*-PTHF conetwork, containing PTHFDMA with  $M_n$  of 6850 g/mol (a) enlargement of the thermogram in the 100 to 200 °C temperature range (b) (heating rate = 10 °C/min).

## ELECTRONIC SUPPLEMENTARY INFORMATION

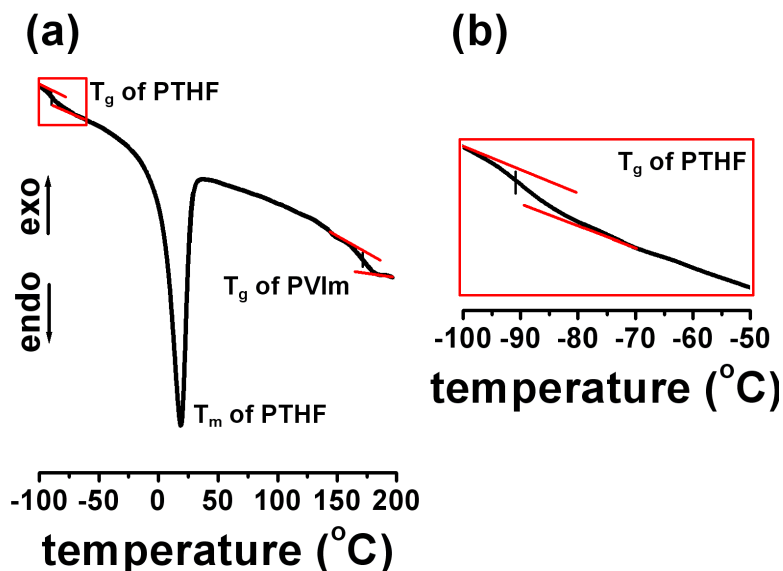

**Fig. S17** Differential scanning calorimetry (DSC) thermogram (second heating scan) of V10k-46 (46 wt% PTHF) PVIm-*l*-PTHF conetwork, containing PTHFDMA with  $M_n$  of 10000 g/mol (a) and enlargement of the thermogram in the -100 to -50 °C temperature range (b) (heating rate = 10 °C/min).

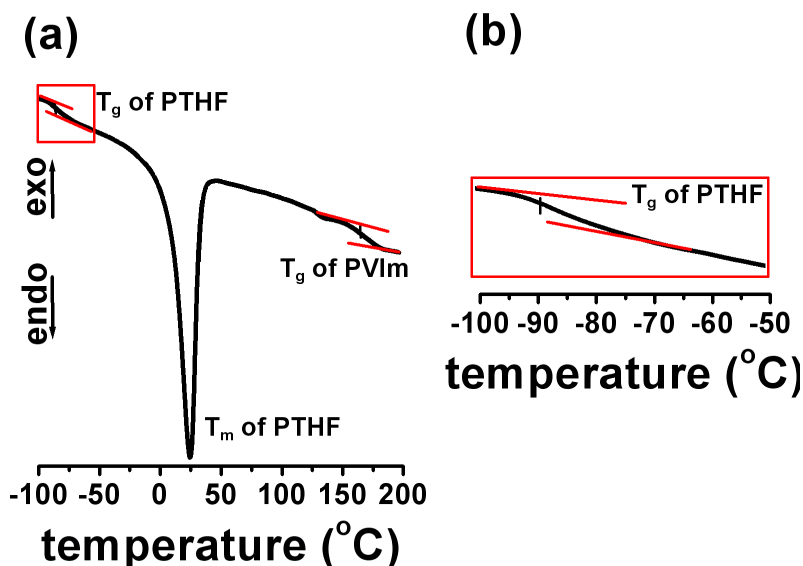

**Fig. S18** Differential scanning calorimetry (DSC) thermogram (second heating scan) of V10k-61 (61 wt% PTHF) PVIm-*l*-PTHF conetwork, containing PTHFDMA with  $M_n$  of 10000 g/mol (a) and enlargement of the thermogram in the 100 to 200 °C temperature range (b) (heating rate = 10 °C/min).

## ELECTRONIC SUPPLEMENTARY INFORMATION

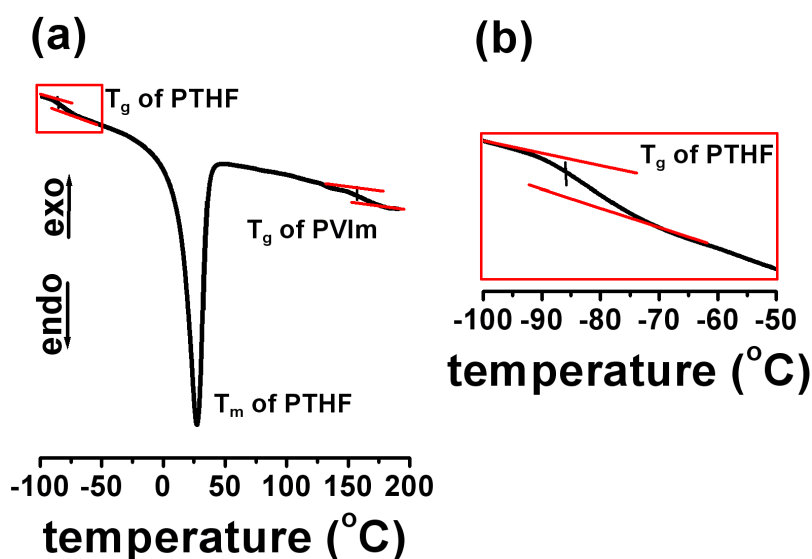

**Fig. S19** Differential scanning calorimetry (DSC) thermogram (second heating scan) of V7k-62 (62 wt% PTHF) PVIm-*l*-PTHF conetwork, containing PTHFDMA with  $M_n$  of 6850 g/mol (a) enlargement of the thermogram in the 100 to 200 °C temperature range (b) (heating rate = 10 °C/min).

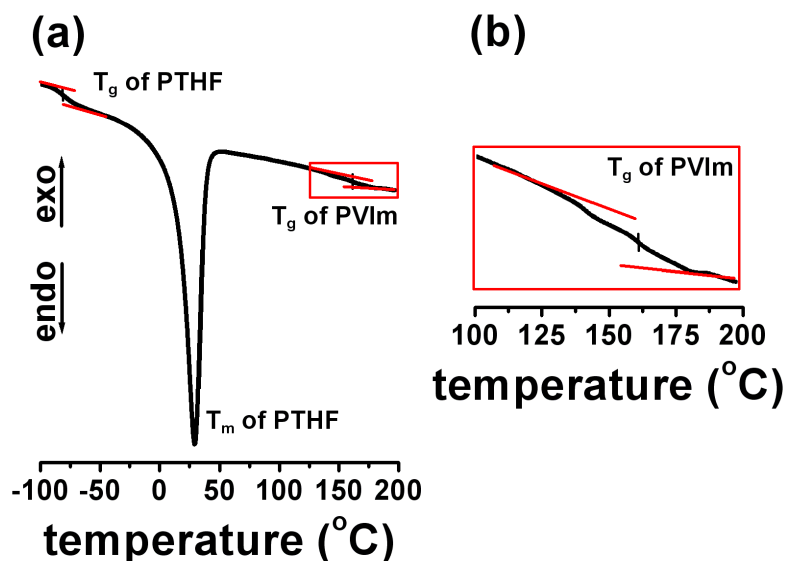

**Fig. S20** Differential scanning calorimetry (DSC) thermogram (second heating scan) of V10k-77 (77 wt% PTHF) PVIm-*l*-PTHF conetwork, containing PTHFDMA with  $M_n$  of 10000 g/mol (a) and enlargement of the thermogram in the 100 to 200 °C temperature range (b) (heating rate = 10 °C/min).

## ELECTRONIC SUPPLEMENTARY INFORMATION

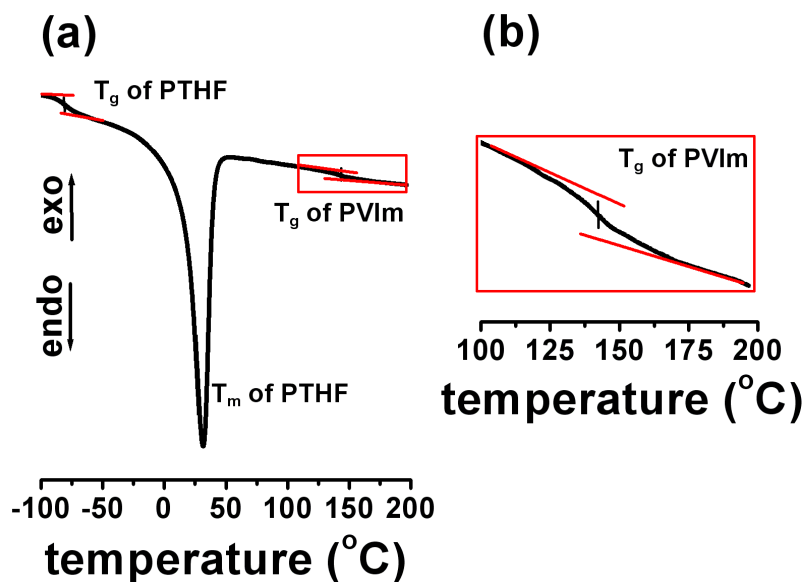

**Fig. S21** Differential scanning calorimetry (DSC) thermogram (second heating scan) of V10k-86 (86 wt% PTHF) PVIm-*l*-PTHF conetwork, containing PTHFDMA with  $M_n$  of 10000 g/mol (a) and enlargement of the thermogram in the 100 to 200 °C temperature range (b) (heating rate = 10 °C/min).

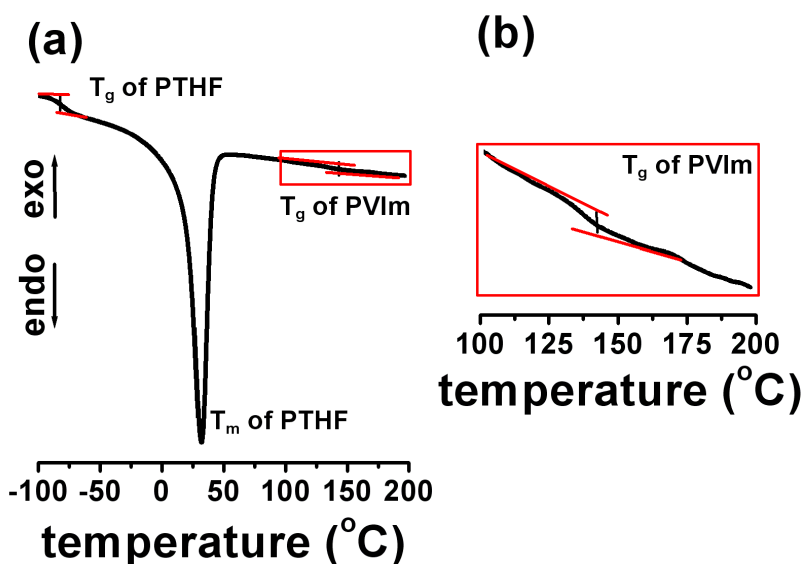

**Fig. S22** Differential scanning calorimetry (DSC) thermogram (second heating scan) of V10k-91 (91 wt% PTHF) PVIm-*l*-PTHF conetwork, containing PTHFDMA with  $M_n$  of 10000 g/mol (a) and enlargement of the thermogram in the 100 to 200 °C temperature range (b) (heating rate = 10 °C/min).

## ELECTRONIC SUPPLEMENTARY INFORMATION

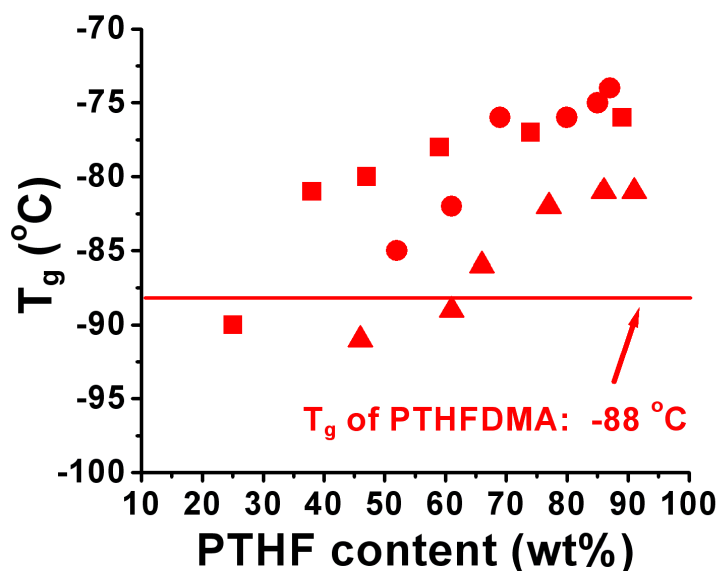

**Fig. S23** Glass transition temperature ( $T_g$ ) values of the poly(tetrahydrofuran) (PTHF) component of poly(*N*-vinylimidazole)-*l*-poly(tetrahydrofuran) (PVIm-*l*-PTHF) conetworks as a function of composition ((■) V2k, (●) V7k, (▲) V10k PVIm-*l*-PTHF series, and the line represents the  $T_g$  of the PTHFDMA macromolecular cross-linker).

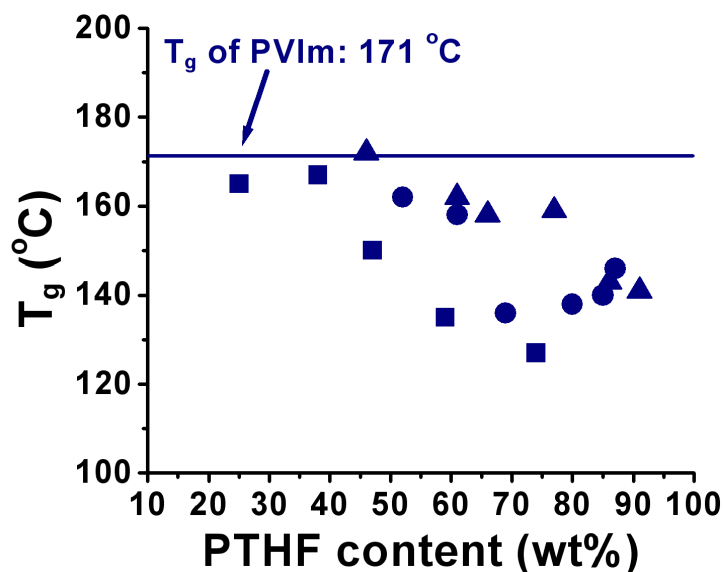

**Fig. S24** Glass transition temperature ( $T_g$ ) values of the poly(*N*-vinylimidazole) (PVIm) component of poly(*N*-vinylimidazole)-*l*-poly(tetrahydrofuran) (PVIm-*l*-PTHF) conetworks as a function of composition ((■) V2k, (●) V7k, (▲) V10k PVIm-*l*-PTHF series, and the line represents the  $T_g$  of the PVIm homopolymer).

## ELECTRONIC SUPPLEMENTARY INFORMATION

**Table S2** Compositions, melting points, crystalline fractions ( $X_c$ ) and glass transition temperatures ( $T_g$ ) of blends consist of poly(*N*-vinylimidazole) (PVIm) and poly(tetrahydrofuran) with varying molecular weights (see Experimental for sample identification).

| Sample code | PVIm/PTHF in blend (wt %) | $T_m$ (°C) | $X_c$ (%) | $T_g$ (PTHF) (°C) | $T_g$ (PVIm) (°C) |
|-------------|---------------------------|------------|-----------|-------------------|-------------------|
| PVIm        | --                        | --         | --        | --                | 171               |
| PTHFDMA2k   | --                        | 23         | 47.1      | -87               | --                |
| PTHFDMA7k   | --                        | 28         | 60.4      | -89               | --                |
| PTHFDMA10k  | --                        | 30         | 75.4      | -89               | --                |
| B2k-90      | 10/90                     | 22         | 45.2      | -87               | 172               |
| B2k-80      | 20/80                     | 22         | 45.7      | -87               | 171               |
| B2k-50      | 50/50                     | 23         | 52.4      | -85               | 173               |
| B7k-50      | 50/50                     | 26         | 63.2      | -88               | 172               |
| B10k-50     | 50/50                     | 29         | 69.4      | -89               | 165               |

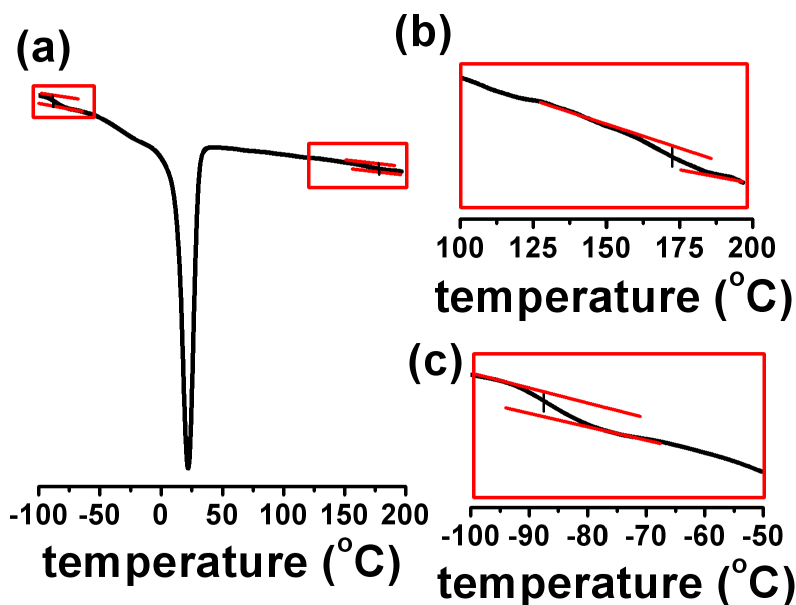

**Fig. S25** Differential scanning calorimetry (DSC) thermogram (second heating scan) of B2k-90 (PVIm:PTHF 10:90 wt%) blends of poly(tetrahydrofuran) and poly(*N*-vinylimidazole) homopolymers, containing PTHFDMA with  $M_n$  of 2170 g/mol (a) enlargement of the thermogram in the 100 to 200 °C temperature range (b) and enlargement of the thermogram in the -100 to -50 °C temperature range (c) (heating rate = 10 °C/min).

## ELECTRONIC SUPPLEMENTARY INFORMATION

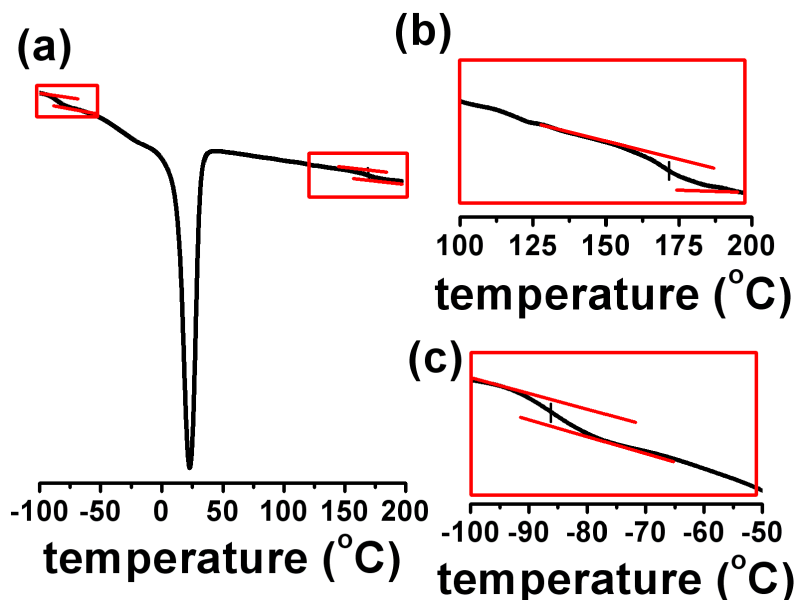

**Fig. S26** Differential scanning calorimetry (DSC) thermogram (second heating scan) of B2k-80 (PVIIm:PTHF 20:80 wt%) blends of poly(tetrahydrofuran) and poly(*N*-vinylimidazole) homopolymers, containing PTHFDMA with  $M_n$  of 2170 g/mol (a) enlargement of the thermogram in the 100 to 200 °C temperature range (b) and enlargement of the thermogram in the -100 to -50 °C temperature range (c) (heating rate = 10 °C/min).

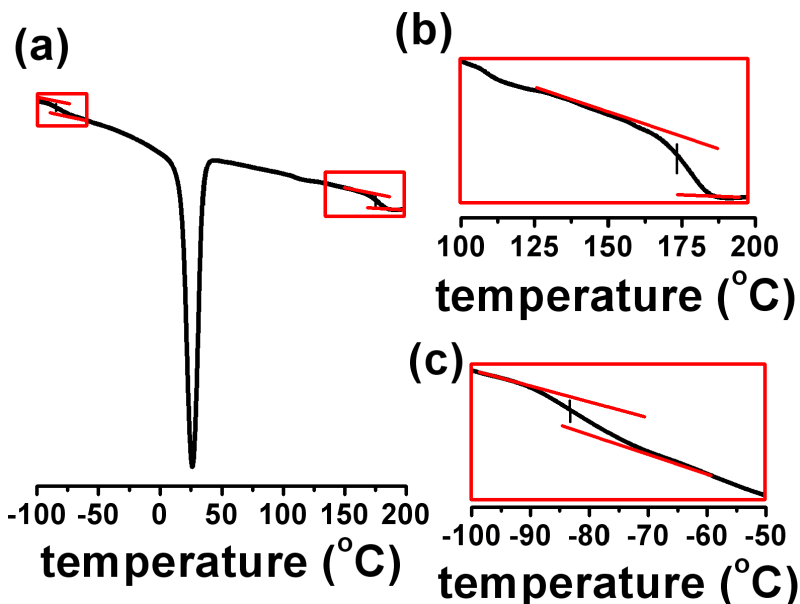

**Fig. S27** Differential scanning calorimetry (DSC) thermogram (second heating scan) of B2k-50 (PVIIm:PTHF 50:50 wt%) blends of poly(tetrahydrofuran) and poly(*N*-vinylimidazole) homopolymers, containing PTHFDMA with  $M_n$  of 2170 g/mol (a) enlargement of the thermogram in the 100 to 200 °C temperature range (b) and enlargement of the thermogram in the -100 to -50 °C temperature range (c) (heating rate = 10 °C/min).

## ELECTRONIC SUPPLEMENTARY INFORMATION

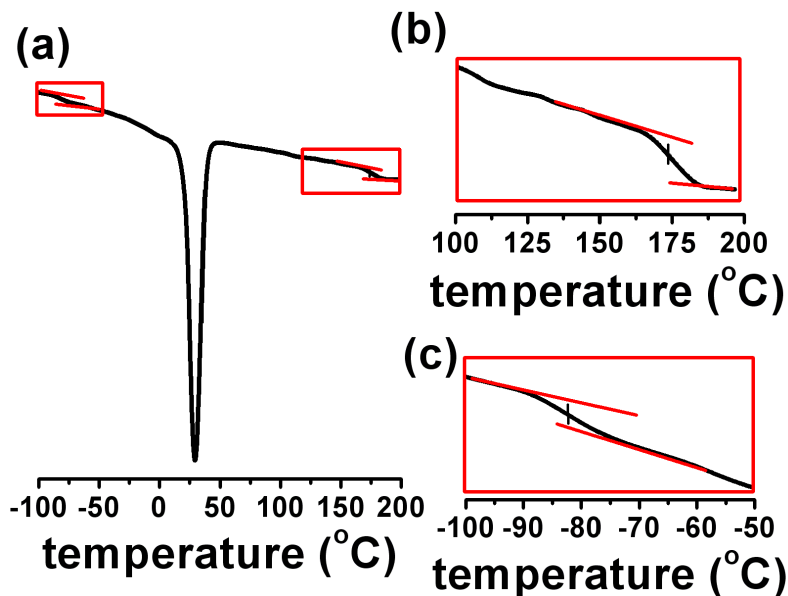

**Fig. S28** Differential scanning calorimetry (DSC) thermogram (second heating scan) of B7k-50 (PVIIm:PTHF 50:50 wt%) blends of poly(tetrahydrofuran) and poly(*N*-vinylimidazole) homopolymers, containing PTHFDMA with  $M_n$  of 6850 g/mol (a) enlargement of the thermogram in the 100 to 200 °C temperature range (b) and enlargement of the thermogram in the -100 to -50 °C temperature range (c) (heating rate = 10 °C/min).

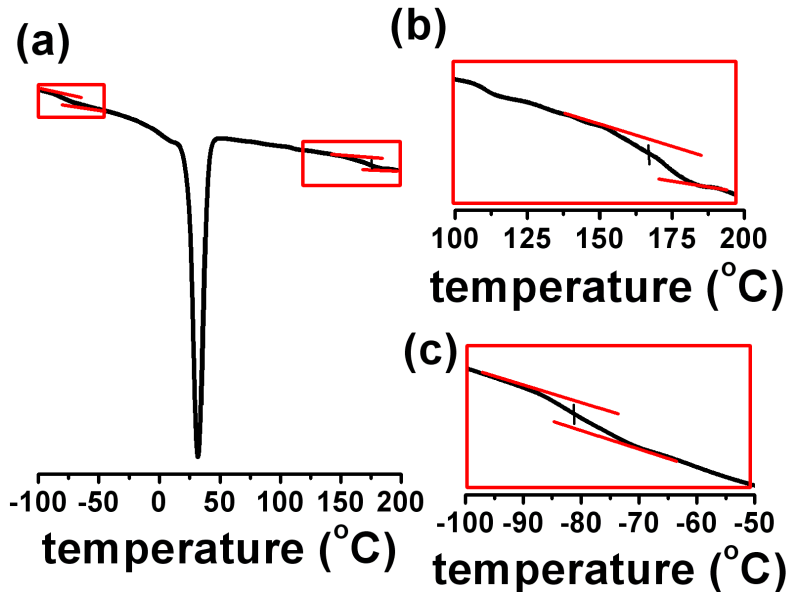

**Fig. S29** Differential scanning calorimetry (DSC) thermogram (second heating scan) of B10k-50 (PVIIm:PTHF 50:50 wt%) blends of poly(tetrahydrofuran) and poly(*N*-vinylimidazole) homopolymers, containing PTHFDMA with  $M_n$  of 10000 g/mol (a) enlargement of the thermogram in the 100 to 200 °C temperature range (b) and enlargement of the thermogram in the -100 to -50 °C temperature range (c) (heating rate = 10 °C/min).

## ELECTRONIC SUPPLEMENTARY INFORMATION

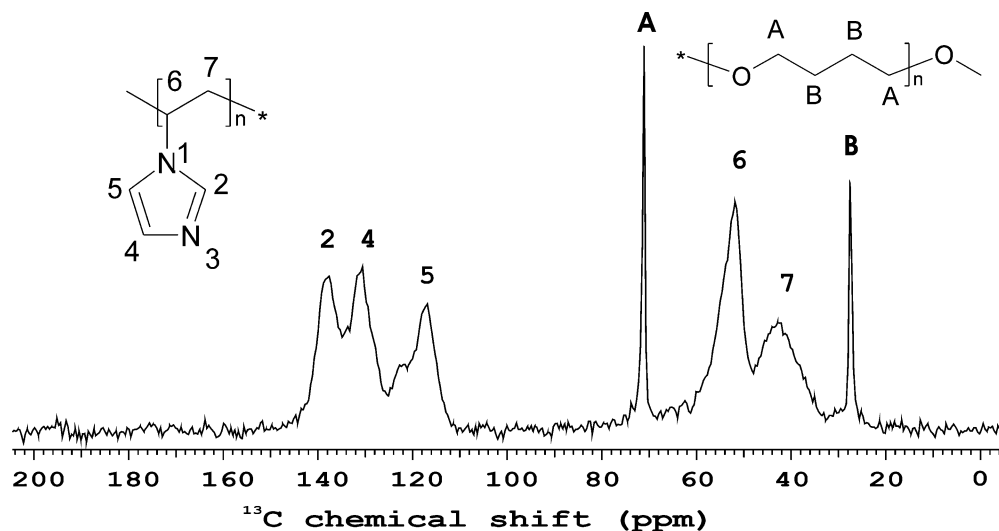

**Fig. S30** Cross polarization magic angle spinning spectra of V7k-52 poly(*N*-vinylimidazole)-*l*-poly(tetrahydrofuran) (PVIIm-*l*-PTHF) sample at 40 °C with contact time of 2ms. The spinning speed was 8 kHz.

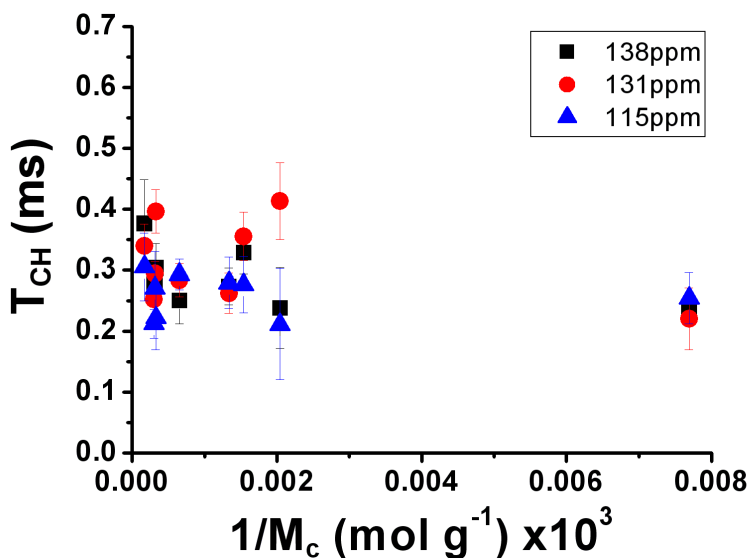

**Fig. S31** Time coefficient of the cross polarization ( $T_{\text{CH}}$ ) of the aromatic carbons of the poly(*N*-vinylimidazole) phase at 40 °C as a function of the average molecular weights of the hydrophilic PVIIm segments between two cross-linking points ( $M_c$ ) in the poly(*N*-vinylimidazole)-*l*-poly(tetrahydrofuran) (PVIIm-*l*-PTHF) conetworks.

## ELECTRONIC SUPPLEMENTARY INFORMATION

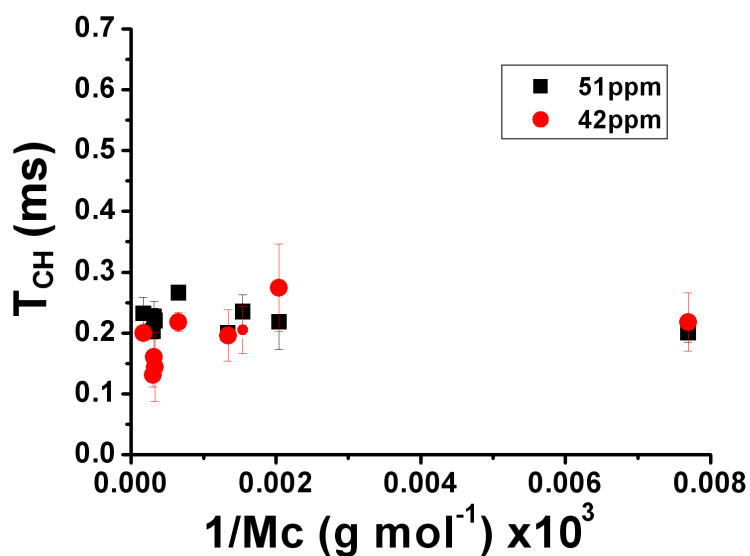

**Fig. S32** Time coefficient of the cross polarization ( $T_{CH}$ ) of the aliphatic carbons of the poly(*N*-vinylimidazole) phase at 40 °C as a function of the average molecular weights of the hydrophilic PVIm segments between two cross-linking points ( $M_c$ ) in the poly(*N*-vinylimidazole)-*l*-poly(tetrahydrofuran) (PVIm-*l*-PTHF) conetworks.
